# Using supervised learning methods for gene selection in RNA-Seq case-control studies

1 **Stephane Wenric<sup>1,2\*</sup>▪, Ruhollah Shemirani<sup>3</sup>▪**

2 <sup>1</sup>University of Liège, GIGA-Research, Laboratory of Human Genetics, Liège, Belgium

3 <sup>2</sup>The Charles Bronfman Institute for Personalized Medicine, Icahn School of Medicine at Mount  
4 Sinai Hospital, New York, NY, USA

5 <sup>3</sup>Information Sciences Institute, University of Southern California, Marina del Rey, CA, USA

6 **\* Correspondence:**

7 Stephane Wenric

8 [stephane.wenric@mssm.edu](mailto:stephane.wenric@mssm.edu)

9 ▪ Both authors contributed equally to this work

10 **Keywords: RNA-Seq, supervised learning, random forests, variational autoencoders, gene**  
11 **selection, feature selection, transcriptomics, gene expression**

## 12 **Abstract**

13 Whole transcriptome studies typically yield large amounts of data, with expression values for all genes  
14 or transcripts of the genome. The search for genes of interest in a particular study setting can thus be a  
15 daunting task, usually relying on automated computational methods. Moreover, most biological  
16 questions imply that such a search should be performed in a multivariate setting, to take into account  
17 the inter-genes relationships.

18 Differential expression analysis commonly yields large lists of genes deemed significant, even after  
19 adjustment for multiple testing, making the subsequent study possibilities extensive.

20 Here, we explore the use of supervised learning methods to rank large ensembles of genes defined by  
21 their expression values measured with RNA-Seq in a typical 2 classes sample set. First, we use one of  
22 the variable importance measures generated by the random forests classification algorithm as a metric  
23 to rank genes. Second, we define the EPS (extreme pseudo-samples) pipeline, making use of VAEs  
24 (Variational Autoencoders) and regressors to extract a ranking of genes while leveraging the feature  
25 space of both virtual and comparable samples.

26 We show that, on 12 cancer RNA-Seq data sets ranging from 323 to 1210 samples, using either a  
27 random forests based gene selection method or the EPS pipeline outperforms differential expression  
28 analysis for 9 and 8 out of the 12 datasets respectively, in terms of identifying subsets of genes  
29 associated with survival.

30 These results demonstrate the potential of supervised learning-based gene selection methods in RNA-  
31 Seq studies and highlight the need to use such multivariate gene selection methods alongside the widely  
32 used differential expression analysis.

33

## 34 1 Introduction

35 Transcriptomics studies making use of RNA-Seq usually produce large amounts of data, namely one  
36 expression value for each gene or transcript of each sample assessed [Wang2009, Mortazavi2008].

37 Searching for genes of interest or prioritizing genes in the context of case-control studies related to  
38 diseases or other experimental conditions constitutes an important task ascribed to RNA-Seq  
39 experiments [Trapnell2009, Garber2011, Love2014, Wenric2017].

40 Current methods often make use of differential expression analysis, to select genes of interest and  
41 assign them a p-value related to a statistical test assessing changes in expression between different  
42 conditions.

43 Most commonly used software packages performing differential expression analysis make use of the  
44 negative binomial distribution to model read counts for each gene. This distribution, which is an  
45 extension of the Poisson distribution, has two parameters: the mean and the dispersion, which allows  
46 modeling of more general mean–variance relationships than Poisson. The dispersion parameter allows  
47 to take into account the biological variability arising in RNA-Seq data [Love2014, Huang2015].

48 However, even though software packages like DESeq2 model relationships between genes by  
49 assuming that genes of similar average expression have a similar dispersion, the statistical test  
50 conducted to assess significance is a univariate test performed independently for each gene. Albeit  
51 providing particularly useful and usually accurate information regarding disruptions of gene expression  
52 between conditions, these methods thus do not take into account the potential correlation and  
53 concordant or discordant effect between groups of genes. However, such gene-gene interactions are  
54 present in most tissues and conditions and they are known to play key roles in said conditions, with  
55 groups of genes which might have a significant effect as a group but not when each gene is considered  
56 independently [Kanehisa2000, Joshitope2005, Phillips2008, Vidal2011].

57 Here, we explore the use of multivariate classifiers to rank genes in a case-control RNA-Seq  
58 experiment. Namely, we're using the permutation importance of the random forests classifier to rank  
59 genes, and a newly developed method (EPS) making use of Variational Autoencoders.

60 Machine learning methods are progressively being applied to problems arising in genomics related  
61 fields and the idea of using importance measures generated by the random forests algorithm to extract  
62 a ranking of features has already been explored with several different data sets, although, to our  
63 knowledge, this has never been done with RNA-Seq data sets [Schridder2018, Freres2016, Yao2015,  
64 Duro2012, Anaissi2013].

65 Aside from random forests, we also introduce a technique called Extreme Pseudo-Sampling (EPS)  
66 allowing to create case and control pseudo-samples lying on the two extremes of the sample space.  
67 This method uses Variational Autoencoders (VAE) [Kingma2013] to create new pseudo-samples that  
68 are not present in the original datasets but closely imitate their statistical properties, in that they share  
69 the properties of independent and identically distributed samples from the same distribution as the real  
70 data.

71 The idea of using autoencoders to classify and examine genomics datasets is not new [Tan2015].  
72 However, VAEs differ from other autoencoders in that they can create a meaningful latent  
73 representation space where one can choose a new vector in the latent space and create a valid,

74 previously unseen sample in real space that closely follows the real samples (the aforementioned  
75 pseudo-samples).

76 Additionally, although autoencoders have been used as an auxiliary tool in the classification of existing  
77 datasets, no attempt has been made to extract the knowledge learnt by the autoencoders in this process  
78 to trace the analysis and results back to the actual gene expression values and their relationships. Here,  
79 we suggest a way to make use of that information [Tan2015].

## 80 2 Materials and Methods

### 81 2.1 Data sets

82 Several data sets from the TCGA database have been selected to validate both methods  
83 [Weinstein2013].

84 Only the data sets containing 30 healthy samples (denoted as “Solid Tissue Normal” in the TCGA  
85 database) or more have been selected. All read counts produced by HTSeq as well as the clinical data  
86 have been downloaded with the TCGABiolinks R/Bioconductor package [Colaprico2016].

87 The data sets selected are summarized in Table 1.

88

89

| Name      | Cancer type                           | N (tumors) | n (healthy) | Median age | Age range |
|-----------|---------------------------------------|------------|-------------|------------|-----------|
| TCGA-BRCA | Breast invasive carcinoma             | 1097       | 113         | 59.07      | 26-90     |
| TCGA-LUAD | Lung adenocarcinoma                   | 582        | 59          | 66.88      | 33-88     |
| TCGA-UCEC | Uterine Corpus endometrial carcinoma  | 559        | 35          | 64.24      | 31-90     |
| TCGA-KIRC | Kidney renal clear cell carcinoma     | 535        | 72          | 61.16      | 26-90     |
| TCGA-HNSC | Head and neck squamous cell carcinoma | 528        | 44          | 61.14      | 20-90     |
| TCGA-THCA | Thyroid carcinoma                     | 507        | 58          | 46.92      | 15-89     |
| TCGA-LUSC | Lung squamous cell carcinoma          | 504        | 49          | 68.66      | 39-90     |
| TCGA-PRAD | Prostate adenocarcinoma               | 498        | 52          | 61.99      | 42-78     |
| TCGA-COAD | Colon adenocarcinoma                  | 460        | 41          | 68.88      | 31-90     |
| TCGA-STAD | Stomach adenocarcinoma                | 443        | 32          | 67.56      | 30-90     |
| TCGA-LIHC | Liver hepatocellular carcinoma        | 377        | 50          | 61.53      | 16-88     |
| TCGA-KIRP | Kidney renal papillary cell carcinoma | 291        | 32          | 62.03      | 28-88     |

90

91

92

*Table 1. TCGA data sets used in this study.*

## 93 2.2 Methodology

94 For each data set, the methodology illustrated in Fig. 1 has been applied:

- 95 • All samples are normalized with the DESeq2 software package [Love2014].
- 96 • The samples are split into a training set and a validation set. The training set contains all the  
97 healthy samples of the original data set ( $n$ ) and the same number of tumor samples as healthy  
98 samples ( $n$ ). The validation set contains the remaining tumor samples ( $N - n$ ).
- 99 • Differential expression analysis is performed on the training set with the DESeq2 software  
100 package, using default parameters and options. A ranking of genes, based on their adjusted p-  
101 value relative to the differential expression test, is obtained.
- 102 • A random forests classifier is built on the training set with the ranger R package, using 100000  
103 trees and a value for the  $m_{try}$  parameter of 236 (equal to the square root of the total number of  
104 features) [Wright2015]. A ranking of genes based on their permutation importance values is  
105 obtained (the permutation importance is computed by randomly permuting the values of the  
106 feature of interest and measuring the resulting increase in error).
- 107 • The Extreme Pseudo-Sampling method (see 2.3) is applied on the training set(s) to extract a  
108 ranking of genes.
- 109 • Let  $RF$  denote the random forests based gene ranking,  $DE$  the differential expression based  
110 gene ranking and  $EPS$  the extreme pseudo-samples based gene ranking.  $RF_i$  denotes the  $i$ -th  
111 gene of the random forests based gene ranking. Similarly,  $DE_i$  denotes the  $i$ -th gene of the  
112 differential expression based gene ranking and  $EPS_i$  denotes the  $i$ -th gene of the extreme  
113 pseudo-samples based gene ranking.
- 114 • For both rankings, 20 gene signatures are generated, including an incremental number of genes.  
115 Let  $sigRF_i$  denote the  $i$ -th gene signature based on the random forests ranking,  $sigDE_i$  denote  
116 the  $i$ -th gene signature based on the differential expression ranking and  $sigEPS_i$  the  $i$ -th gene  
117 signature based on the extreme pseudo-samples ranking. The signatures are formally defined  
118 as:
  - 119 ○  $sigRF_i = \{RF_1, \dots, RF_i\}$ , for  $i = 1, \dots, 20$
  - 120 ○  $sigDE_i = \{DE_1, \dots, DE_i\}$ , for  $i = 1, \dots, 20$
  - 121 ○  $sigEPS_i = \{EPS_1, \dots, EPS_i\}$ , for  $i = 1, \dots, 20$
- 122 • For each signature,
  - 123 ○ A Cox proportional hazard model was built using all genes of the signature
  - 124 ○ The samples of the validation set were split into two groups (higher and lower survival),  
125 based on the median of the Cox proportional hazard model.
  - 126 ○ A log-rank test was performed to compare the survival of the two groups.

- 127 • For  $i = \{1, \dots, 20\}$ , the p-value of the log-rank tests obtained with  $sigDE_i$ ,  $sigRF_i$ ,  $sigEPS_i$   
128 are compared.

129

130 For each data set, correlation coefficients have been computed between the expression values of the  
131 50% most expressed genes; a hierarchical clustering of the 50% most expressed genes was performed,  
132 to assess if multicollinearity played a role in the performance of the RF based method (multicollinearity  
133 denotes the presence of non-independent features such that the relationship between each of these  
134 features and the model output is influenced by the relationships between the non-independent features).  
135 A hierarchical clustering of all samples was also performed, with the 50% most expressed genes.  
136 Enrichment analysis was performed on gene lists from both methods.

137 The correlation coefficient between each top-ranked gene from both list and the 50% most expressed  
138 genes has been computed for each data set.

139 Globally, the correlation between the overall survival at 5 years of all cancer types, and the performance  
140 of the presented methods was computed.

### 141 **2.3 Extreme Pseudo-Sampling**

142 It is worth noting that, in most data sets considered in this study, the samples from both classes reside  
143 in a high dimensional space and are tightly coordinated together, such that a linear classifier cannot  
144 separate them at all. The low count of normal samples compared to the total sum of samples also  
145 contributes to the failure of linear classifiers; which tend to receive bias from such unbalance of class  
146 membership statistics.

147 We decided to use a dimensionality reduction technique in order to both address the *curse of*  
148 *dimensionality* and find a representation in which these samples lay in a linearly-separable subspace.

149 Autoencoders have shown to be able to create such latent representations better than their linear  
150 counterparts such as PCA [Tan2015, Danaee2016]. However, such representations do not provide us  
151 with useful, actionable knowledge about genes due mainly to their non-linear activation functions.

152 Moreover, Normal Autoencoders are not generative, i.e. while it is possible to come up with useful  
153 latent representations for classification purposes, one cannot generate new samples similar to the real  
154 samples by slightly modifying their latent representation values and feeding the result into the decoder  
155 network.

156 A new type of Autoencoder, called the Variational Autoencoder, however, can succeed in this task  
157 [Kingma2013]. VAEs are fundamentally different from other AEs in that they are generative models:

158 Each point  $x$  in real space will be associated with distribution  $P(z|x)$ . For the purpose of this  
159 methodology, we assumed this distribution to be normal. Getting latent representation  $z_l$  from sample  
160  $x_l$ , thus, would be equal to drawing a sample from distribution  $\mathcal{N}(\mu_l, \sigma_l)$ , where  $\mu_l, \sigma_l$  are learned from  
161 the training data.

162 The training VAE comprises 9 layers, having 30000, 15000, 10000, 2000, 500, 2000, 10000, 15000,  
163 30000 perceptrons respectively. The training process of these layers requires fine-tuning approximately  
164 5 billion parameters. Given that the performance of this fine-tuning process increases with the number

165 of samples, in addition to the training set extracted from the studied TCGA dataset, a random selection  
166 of samples from the 11 other training sets is used in the VAE training process.

167 After the training step, each dataset  $D_c$  is transformed to its latent representation  $L_c$ . Said latent  
168 representation allows to linearly separate the normal samples from cancerous ones with almost 100%  
169 accuracy for both testing and training datasets. Considering the linear separator, let us denote the  
170 furthest populated areas on both sides of the separator, called  $N_c$  for the normal side of the linear  
171 separator and  $C_c$  for the cancerous side. If we consider a point  $z_n$  in one of these areas, we know it has  
172 been randomly drawn from distribution  $\mathcal{N}(\mu_n, \sigma_n)$ .

173 While selecting  $z_n$  is a random process, once a  $z_n$  has been drawn from any of the distributions,  
174 reconstructing  $\hat{x}_n \approx x_n$  from  $z_n$  is a deterministic process done by the decoder. However, every point in  
175 the close proximity of  $z_n$  can be drawn from the same distribution. Due to the deterministic features of  
176 the decoder, each of these points would end up generating a different  $\hat{x}_n$ . Although different, every  
177 possible  $\hat{x}_n$  should resemble the original  $x_n$  closely and should also follow the general statistical  
178 characteristics of all  $x$ 's in the dataset.

179 We then drew 400 random points in areas  $N_c$  and  $C_c$  of the latent space  $L_c$ , on both sides of the linear  
180 separator and generated new “virtual” or “pseudo” samples of both cancerous and normal classes, a  
181 process that we call Extreme Pseudo Sampling (EPS). The amount of random points drawn (400) was  
182 chosen using cross validation on the training data. It was the smallest number of samples that ended up  
183 in a successful regression process.

184 While real samples cannot be divided using a linear separator and suffer from unbalance of class  
185 member counts; we were able to generate new pseudo samples that can be divided linearly in real space  
186 due to their exaggerated cancerous/normal features. These samples also are of equal count. The later  
187 trait enables the dividing regression lines to be less biased towards a specific class. Thus, said  
188 regression lines maintain the same distance from both classes.

189 Finally, since all sample features have been normalized in the process, weight coefficients in the line  
190 formula can be translated into importance factors for classifying extreme pseudo samples. The larger  
191 a coefficient, the more important its related feature is in determining class membership. Thereby, we  
192 are able to extract an importance ranking for all genes, in each data set.

193 The R and Python scripts used to perform the aforementioned analyses are available online:  
194 [https://github.com/stephwen/ML\\_RNA-Seq](https://github.com/stephwen/ML_RNA-Seq) & <https://github.com/roohy/Extreme-Pseudo-Sampler>

### 195 **3 Results**

196 For each data set, 60 log-rank tests have been performed on the validation set, using gene signatures  
197  $sigDE_i$ ,  $sigRF_i$ , and  $sigEPS_i$  with  $i = \{1, 2, \dots, 20\}$  which contain from 1 to 20 genes out of the gene  
198 ranking derived from differential expression analysis, the gene ranking derived from the random forests  
199 classifier, and the gene ranking derived from the Extreme Pseudo-Sampling method respectively. The  
200 p-values of these tests have been compared two by two.

201 Table 2 summarizes the results and shows the number of gene signatures where the random forests  
202 based gene ranking outperforms the differential expression based gene ranking and where the Extreme-  
203 Pseudo Sampling method outperforms the differential expression based gene ranking.

204

| Name      | Cancer type                           | Random forests | Extreme pseudo-samples |
|-----------|---------------------------------------|----------------|------------------------|
| TCGA-BRCA | Breast invasive carcinoma             | 5              | 19                     |
| TCGA-LUAD | Lung adenocarcinoma                   | 14             | 14                     |
| TCGA-UCEC | Uterine Corpus endometrial carcinoma  | 16             | 9                      |
| TCGA-KIRC | Kidney renal clear cell carcinoma     | 13             | 10                     |
| TCGA-HNSC | Head and neck squamous cell carcinoma | 14             | 15                     |
| TCGA-THCA | Thyroid carcinoma                     | 15             | 15                     |
| TCGA-LUSC | Lung squamous cell carcinoma          | 5              | 0                      |
| TCGA-PRAD | Prostate adenocarcinoma               | 12             | 19                     |
| TCGA-COAD | Colon adenocarcinoma                  | 11             | 18                     |
| TCGA-STAD | Stomach adenocarcinoma                | 13             | 19                     |
| TCGA-LIHC | Liver hepatocellular carcinoma        | 19             | 8                      |
| TCGA-KIRP | Kidney renal papillary cell carcinoma | 10             | 19                     |

205

206 *Table 2. The random forests column denotes the number of random forests based signatures having*  
 207 *a lower log-rank p-value than their corresponding differential expression based signatures. The*  
 208 *extreme pseudo-samples column denotes the number of extreme pseudo-samples based signatures*  
 209 *having a lower log-rank p-value than their corresponding differential expression based signatures.*  
 210 *The 3 colors (green, yellow, red) refer to cases where the proposed methods have a higher number,*  
 211 *the same number, and a lower number of best-performing gene signatures than DESeq2,*  
 212 *respectively.*

213

214 For 9 out of the 12 data sets analyzed (lung adenocarcinoma, uterine corpus endometrial carcinoma,  
 215 kidney renal clear cell carcinoma, head and neck squamous cell carcinoma, thyroid carcinoma, prostate  
 216 adenocarcinoma, colon adenocarcinoma, stomach adenocarcinoma, liver hepatocellular carcinoma),  
 217 the random forests based gene ranking outperforms the differential expression based gene ranking in  
 218 terms of identifying subsets of genes associated with survival. For 8 out of the 12 datasets (breast  
 219 invasive carcinoma, lung adenocarcinoma, head and neck squamous cell carcinoma, thyroid  
 220 carcinoma, prostate adenocarcinoma, colon adenocarcinoma, stomach adenocarcinoma, kidney renal  
 221 papillary cell carcinoma), the extreme pseudo-samples based gene ranking outperforms the differential  
 222 expression based gene ranking. For one data set (kidney renal papillary cell carcinoma), both the  
 223 DESeq2 and the random forests based gene rankings share the same number of best performing  
 224 signatures. For one data set (kidney renal clear cell carcinoma), both the DESeq2 and the extreme  
 225 pseudo-samples based gene rankings share the same number of best performing signatures. For 2 out

226 of the 12 data sets (breast invasive carcinoma, lung squamous cell carcinoma), the differential  
227 expression based gene ranking outperforms the random forests based gene ranking. For 3 out of the 12  
228 data sets (uterine corpus endometrial carcinoma, lung squamous cell carcinoma, liver hepatocellular  
229 carcinoma), the differential expression based gene ranking outperforms the extreme pseudo-samples  
230 based gene ranking.

231 Figure 2 shows the log-rank p-values for the 3 different methods (DESeq2, random forests, extreme  
232 pseudo-samples) and their respective gene signatures ranging from 1 to 20 genes, for the 4 largest data  
233 sets (TCGA-BRCA, TCGA-LUAD, TCGA-UCEC, TCGA-KIRC). Similar figures for the 8 other data  
234 sets are available as supplementary data. The log-rank p-values for the 20 gene signatures related to  
235 the 3 rankings for each dataset and the genome wide ranking of genes based on the permutation  
236 importance computed by the random forests classifier and on the extreme pseudo-samples method can  
237 be found in Supplementary Table 1 and Supplementary Table 2 respectively.

238 No significant difference in the average absolute correlation coefficient obtained between the 50%  
239 most expressed genes was found between the different cohorts whose DE based signatures performed  
240 better than the RF and EPS signatures and the cohorts whose RF or EPS based signatures performed  
241 better than the DE ones. No significant difference in terms of the number of clusters of samples  
242 obtained with a hierarchical clustering with the 50% most expressed genes when using a constant  
243 height cutoff value of  $h = 2 \cdot 10^6$  was found between the different cohorts whose DE based signatures  
244 performed better than the RF and EPS signatures and the cohorts whose RF or EPS based signatures  
245 performed better than the DE ones. No significant difference in terms of the number of clusters of  
246 genes obtained with a hierarchical clustering with the 50% most expressed genes when using a constant  
247 height cutoff value of  $h = 10^5$  was found either. No significant difference was found between the  
248 correlation between the top-ranked genes selected with both methods and the 50% most expressed  
249 genes. No correlation was found between the overall survival at 5 years of the different cancer types  
250 and the performance of either method (measured as the ratio of  $n/20$  top-performing signatures). There  
251 is, however, a loose correlation (Pearson correlation coefficient: 0.627, p-value: 0.029) between the  
252 number of best-performing DE based signatures among the 20 signatures of each data set and the  
253 number of differentially expressed genes (adjusted p-value  $< 0.05$ ) in each data set. Correlation  
254 coefficients and numbers of clusters are present, for all data sets, in Supplementary Table 3.

#### 255 4 Discussion

256 Highlighting genes of interest has always been a part of transcriptomics studies and the advent of  
257 RNA sequencing technologies has but further emphasized this endeavor. Traditionally, genes of  
258 interest, in case-control studies where one had access to their expression values, were genes where  
259 said expression varied greatly from one class to the other. This definition has led to the development  
260 of numerous methods making use of diverse statistical models and tests, achieving impressive results  
261 in a lot of different use cases. However, these methods often implicitly neglected the importance of  
262 gene-gene relationships, by only looking at univariate changes.

263 Here, we propose a paradigm shift, by directing the search for genes of interest towards the use of  
264 machine learning methods originally conceived to predict the membership of a sample in a class, as  
265 these methods intrinsically model the inter-variable relationships (*i.e.* the previously overlooked  
266 gene-gene links).



267 An obvious kind of data sets which should theoretically benefit from this are cancers, as these  
268 pathologies are known to involve several genes in a multistep process, with different mechanisms  
269 implicating intricate relationships between said genes [Vogelstein2013, Yates2012].

270 By using 12 data sets containing samples of various cancers, we have shown that supervised  
271 classification algorithms could be used to extract a meaningful ranking of genes. Namely, the  
272 permutation importance (also known as Mean Decrease in Accuracy) generated by the random  
273 forests algorithm and the weights coefficients used in the extreme pseudo-samples provided a  
274 ranking of genes which outperformed classical methods in most data sets.

275 The permutation importance is not the only variable importance generated by the random forests  
276 classifier, as the Gini importance (or Mean Decrease in Impurity) is also available. However, using  
277 the Gini importance to classify the genes of these data sets yielded slightly worse results than the  
278 results obtained with the permutation importance. Using a combination of both variable importances,  
279 as in [Frères2016], also produced worse results than when using the permutation importance alone.

280 Given the fact that neither the random forests based gene ranking nor the extreme pseudo-samples  
281 based one outperformed the differential expression based one for all of the 12 data sets, one might  
282 wonder if using both a supervised learning based gene selection technique in conjunction with  
283 differential expression would not yield better results. However, using the supervised learning based  
284 gene selection method after the differential expression one (*i.e.* using only the genes with a  
285 significant differential expression adjusted p-value as input features of the random forests classifier  
286 or the EPS method) also produced worse results than when using the random forests gene ranking or  
287 the EPS gene ranking alone.

288 Using survival analysis as a way to validate gene lists coming from cancer data sets whose average  
289 survival differs greatly might spark questions, however there does not seem to be a link between the  
290 overall survival (OS) of these cancers and the performance of the proposed methods. Survival  
291 information constitutes a quantifiable and relatively easily available information for different data  
292 sets. However, using the presumed relationship between the expression values of a gene and the  
293 survival of a patient as a proxy for the role of said gene in the selected disease relies on a strong  
294 hypothesis whose validity might vary across data sets. Therefore, other gene ranking validation  
295 methods should be further explored to assess the performance of a random forests based gene ranking  
296 method and the EPS method in a wider range of RNA-Seq experiments.

297 In conclusion, we have shown that using the permutation importance internally computed by the  
298 random forests algorithm, when said algorithm is used to build a classifier based on gene expression  
299 values of a case-control RNA-Seq data set, allowed to obtain a ranking of genes; Variational  
300 Autoencoders could be used to generate pseudo-samples mimicking the properties of real samples,  
301 albeit with extreme localizations in latent space; Using the feature weights of said pseudo-samples  
302 allowed to obtain a ranking of genes. These rankings were compared with the results of a differential  
303 expression analysis, with all three gene rankings being evaluated through survival analysis on a  
304 validation cohort different from the cohort used to generate both rankings. The results have shown  
305 that the random forests based method and the extreme pseudo-samples outperformed the differential  
306 expression based method for 9 and 8 out of the 12 data sets analyzed, respectively. Although the  
307 genes selected by both methods are different, there is no significant difference in the number of  
308 highly correlated genes between both methods. Although the goal of this research is not to supersede  
309 differential expression analysis to select genes of interest in RNA-Seq studies, we have shown that

310 differential expression analysis might miss out on important genes, and a supervised learning based  
311 gene selection method should be used alongside.

312 As the field of machine learning contains many different supervised classification and feature  
313 selection algorithms, it would be of interest to extend this work by testing the performance of other  
314 methods for gene selection in the context of case-control RNA-Seq data sets.

315

## 316 5 References

- 317 1. Wang2009: Wang, Zhong, Mark Gerstein, and Michael Snyder. "RNA-Seq: a revolutionary  
318 tool for transcriptomics." *Nature reviews genetics* 10, no. 1 (2009): 57.
- 319 2. Mortazavi2008: Mortazavi, Ali, Brian A. Williams, Kenneth McCue, Lorian Schaeffer, and  
320 Barbara Wold. "Mapping and quantifying mammalian transcriptomes by RNA-Seq." *Nature*  
321 *methods* 5, no. 7 (2008): 621.
- 322 3. Trapnell2009: Trapnell, Cole, Lior Pachter, and Steven L. Salzberg. "TopHat: discovering  
323 splice junctions with RNA-Seq." *Bioinformatics* 25, no. 9 (2009): 1105-1111.
- 324 4. Garber2011: Garber, M., Grabherr, M. G., Guttman, M. & Trapnell, C. Garber, Manuel,  
325 Manfred G. Grabherr, Mitchell Guttman, and Cole Trapnell. "Computational methods for  
326 transcriptome annotation and quantification using RNA-seq." *Nature methods* 8, no. 6 (2011):  
327 469.
- 328 5. Love2014: Love, Michael I., Wolfgang Huber, and Simon Anders. "Moderated estimation of  
329 fold change and dispersion for RNA-seq data with DESeq2." *Genome biology* 15, no. 12  
330 (2014): 550.
- 331 6. Wenric2017: Wenric, Stephane, Sonia ElGuendi, Jean-Hubert Caberg, Warda Bezzaou,  
332 Corinne Fasquelle, Benoit Charlotteaux, Latifa Karim et al. "Transcriptome-wide analysis of  
333 natural antisense transcripts shows their potential role in breast cancer." *Scientific reports* 7,  
334 no. 1 (2017): 17452.
- 335 7. Huang2015: Huang, Huei-Chung, Yi Niu, and Li-Xuan Qin. "Differential Expression  
336 Analysis for RNA-Seq: An Overview of Statistical Methods and Computational Software:  
337 Supplementary Issue: Sequencing Platform Modeling and Analysis." *Cancer informatics* 14  
338 (2015): CIN-S21631.
- 339 8. Freres2016: Frères, Pierre, Stéphane Wenric, Meriem Boukerroucha, Corinne Fasquelle,  
340 Jérôme Thiry, Nicolas Bovy, Ingrid Struman et al. "Circulating microRNA-based screening  
341 tool for breast cancer." *Oncotarget* 7, no. 5 (2016): 5416.
- 342 9. Yao2015: Yao, Dengju, Jing Yang, Xiaojuan Zhan, Xiaorong Zhan, and Zhiqiang Xie. "A  
343 novel random forests-based feature selection method for microarray expression data  
344 analysis." *International journal of data mining and bioinformatics* 13, no. 1 (2015): 84-101.

- 345 10. Duro2012: Duro, Dennis C., Steven E. Franklin, and Monique G. Dubé. "Multi-scale object-  
346 based image analysis and feature selection of multi-sensor earth observation imagery using  
347 random forests." *International Journal of Remote Sensing* 33, no. 14 (2012): 4502-4526.
- 348 11. Anaissi2013: Anaissi, Ali, Paul J. Kennedy, Madhu Goyal, and Daniel R. Catchpoole. "A  
349 balanced iterative random forest for gene selection from microarray data." *BMC*  
350 *bioinformatics* 14, no. 1 (2013): 261.
- 351 12. Colaprico2016: Colaprico, Antonio, Tiago C. Silva, Catharina Olsen, Luciano Garofano,  
352 Claudia Cava, Davide Garolini, Thais S. Sabedot et al. "TCGAbiolinks: an R/Bioconductor  
353 package for integrative analysis of TCGA data." *Nucleic acids research* 44, no. 8 (2015): e71-  
354 e71.
- 355 13. Weinstein2013: Weinstein, John N., Eric A. Collisson, Gordon B. Mills, Kenna R. Mills  
356 Shaw, Brad A. Ozenberger, Kyle Ellrott, Ilya Shmulevich, Chris Sander, Joshua M. Stuart,  
357 and Cancer Genome Atlas Research Network. "The cancer genome atlas pan-cancer analysis  
358 project." *Nature genetics* 45, no. 10 (2013): 1113.
- 359 14. Wright2015: Wright, Marvin N., and Andreas Ziegler. "ranger: A fast implementation of  
360 random forests for high dimensional data in C++ and R." *arXiv preprint arXiv:1508.04409*  
361 (2015).
- 362 15. Vogelstein2013: Vogelstein, Bert, Nickolas Papadopoulos, Victor E. Velculescu, Shibin  
363 Zhou, Luis A. Diaz, and Kenneth W. Kinzler. "Cancer genome landscapes." *science* 339, no.  
364 6127 (2013): 1546-1558.
- 365 16. Yates2012: Yates, Lucy R., and Peter J. Campbell. "Evolution of the cancer genome." *Nature*  
366 *Reviews Genetics* 13, no. 11 (2012): 795.
- 367 17. Kanehisa2000: Kanehisa, Minoru, and Susumu Goto. "KEGG: kyoto encyclopedia of genes  
368 and genomes." *Nucleic acids research* 28, no. 1 (2000): 27-30.
- 369 18. Joshitope2005: Joshi-Tope, G., Marc Gillespie, Imre Vastrik, Peter D'Eustachio, Esther  
370 Schmidt, Bernard de Bono, Bijay Jassal et al. "Reactome: a knowledgebase of biological  
371 pathways." *Nucleic acids research* 33, no. suppl\_1 (2005): D428-D432.
- 372 19. Phillips2008: Phillips, Patrick C. "Epistasis—the essential role of gene interactions in the  
373 structure and evolution of genetic systems." *Nature Reviews Genetics* 9, no. 11 (2008): 855.
- 374 20. Vidal2011: Vidal, Marc, Michael E. Cusick, and Albert-László Barabási. "Interactome  
375 networks and human disease." *Cell* 144, no. 6 (2011): 986-998.
- 376 21. Kingma2013: Kingma, Diederik P., and Max Welling. "Auto-encoding variational bayes."  
377 *arXiv preprint arXiv:1312.6114* (2013).
- 378 22. Tan2015: Tan, Jie, Matthew Ung, Chao Cheng, and Casey S. Greene. "Unsupervised feature  
379 construction and knowledge extraction from genome-wide assays of breast cancer with  
380 denoising autoencoders." In *Pacific Symposium on Biocomputing Co-Chairs*, pp. 132-143.  
381 2014.

382 23. Danaee2016: Danaee, Padideh, Reza Ghaeini, and David A. Hendrix. "A deep learning  
383 approach for cancer detection and relevant gene identification." In *PACIFIC SYMPOSIUM*  
384 *ON BIOCOMPUTING 2017*, pp. 219-229. 2017.

385

## 386 **6 Author Contributions**

387 SW: Conceived and designed the experiments; Performed the random forests analysis; Contributed to  
388 the writing of the manuscript. RS: Developed and performed the Extreme-Pseudo Samples analysis;  
389 Contributed to the writing of the manuscript

## 390 **7 Conflict of Interest**

391 The authors declare that the research was conducted in the absence of any commercial or financial  
392 relationships that could be construed as a potential conflict of interest.

## 393 **8 Funding**

394 S.W. was supported by Wallonia through the following grants: WallInnov2016 - NACATS  
395 (1610125), BioWin - TREATBEST - n° 7741, by a Fellowship of the Belgian American Educational  
396 Foundation, and a WBI.World Fellowship.

## 397 **9 Acknowledgments**

398 We thank Claire Josse, Pierre Geurts, Vincent Botta, Eimear Kenny, Gillian Belbin, Jose-Luis  
399 Ambite and Shunsuke Saito. This work was supported in part through the computational resources  
400 and staff expertise provided by Scientific Computing at the Icahn School of Medicine at Mount Sinai.

**A**

# TCGA-BRCA

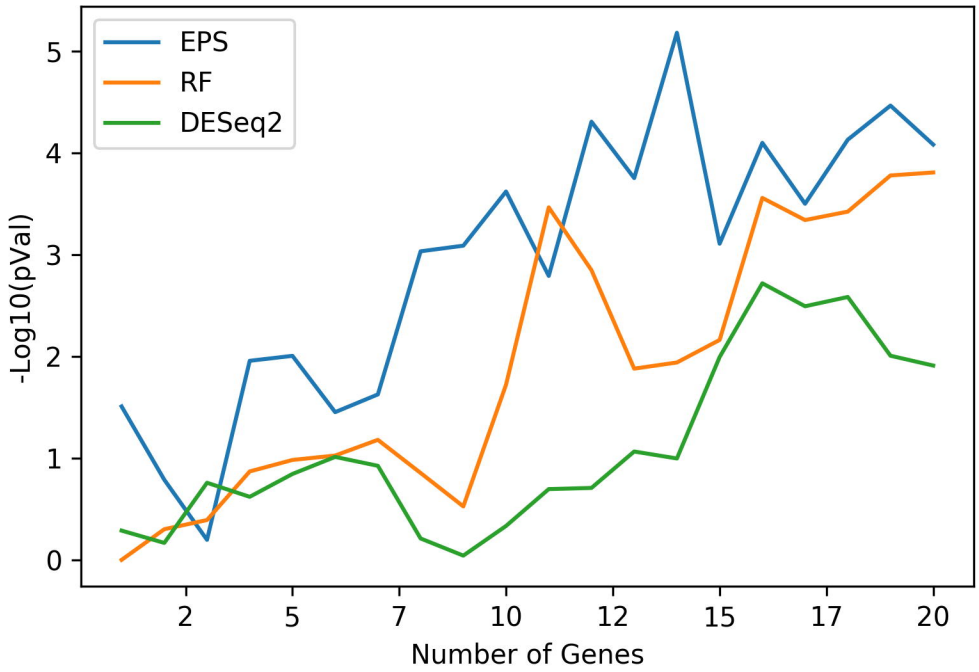**B**

# TCGA-LUAD

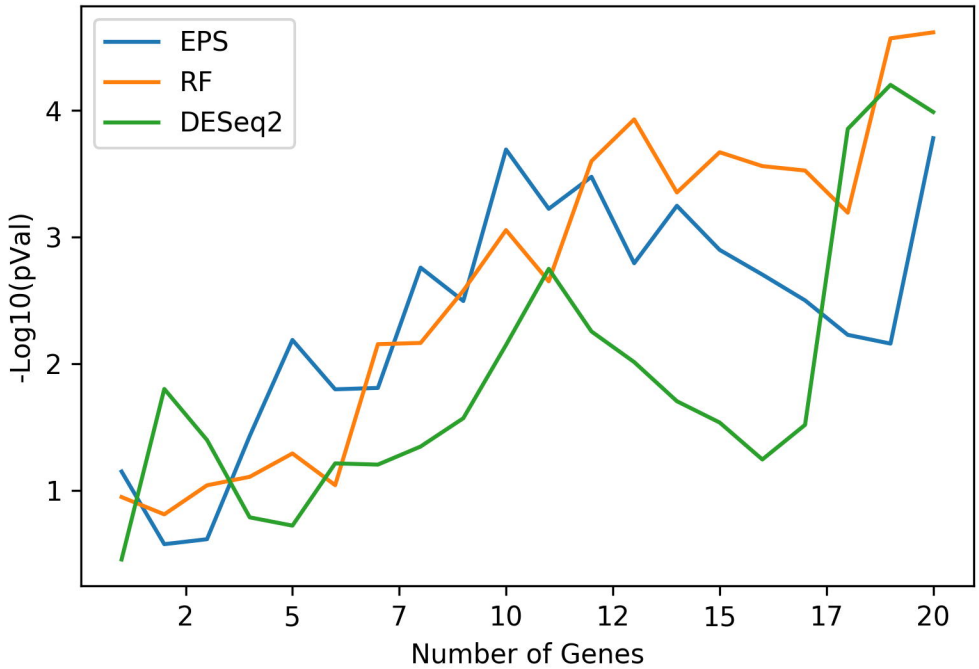

| <b>Name</b> | <b>Cancer type</b>                    | <b>N (tumors)</b> | <b>n (healthy)</b> | <b>Median age</b> | <b>Age range</b> |
|-------------|---------------------------------------|-------------------|--------------------|-------------------|------------------|
| TCGA-BRCA   | Breast invasive carcinoma             | 1097              | 113                | 59.07             | 26-90            |
| TCGA-LUAD   | Lung adenocarcinoma                   | 582               | 59                 | 66.88             | 33-88            |
| TCGA-UCEC   | Uterine Corpus endometrial carcinoma  | 559               | 35                 | 64.24             | 31-90            |
| TCGA-KIRC   | Kidney renal clear cell carcinoma     | 535               | 72                 | 61.16             | 26-90            |
| TCGA-HNSC   | Head and neck squamous cell carcinoma | 528               | 44                 | 61.14             | 20-90            |
| TCGA-THCA   | Thyroid carcinoma                     | 507               | 58                 | 46.92             | 15-89            |
| TCGA-LUSC   | Lung squamous cell carcinoma          | 504               | 49                 | 68.66             | 39-90            |
| TCGA-PRAD   | Prostate adenocarcinoma               | 498               | 52                 | 61.99             | 42-78            |
| TCGA-COAD   | Colon adenocarcinoma                  | 460               | 41                 | 68.88             | 31-90            |
| TCGA-STAD   | Stomach adenocarcinoma                | 443               | 32                 | 67.56             | 30-90            |
| TCGA-LIHC   | Liver hepatocellular carcinoma        | 377               | 50                 | 61.53             | 16-88            |
| TCGA-KIRP   | Kidney renal papillary cell carcinoma | 291               | 32                 | 62.03             | 28-88            |

*Table 1. TCGA data sets used in this study.*

| Name      | Cancer type                           | Random forests | Extreme pseudo-samples |
|-----------|---------------------------------------|----------------|------------------------|
| TCGA-BRCA | Breast invasive carcinoma             | 5              | 19                     |
| TCGA-LUAD | Lung adenocarcinoma                   | 14             | 14                     |
| TCGA-UCEC | Uterine Corpus endometrial carcinoma  | 16             | 9                      |
| TCGA-KIRC | Kidney renal clear cell carcinoma     | 13             | 10                     |
| TCGA-HNSC | Head and neck squamous cell carcinoma | 14             | 15                     |
| TCGA-THCA | Thyroid carcinoma                     | 15             | 15                     |
| TCGA-LUSC | Lung squamous cell carcinoma          | 5              | 0                      |
| TCGA-PRAD | Prostate adenocarcinoma               | 12             | 19                     |
| TCGA-COAD | Colon adenocarcinoma                  | 11             | 18                     |
| TCGA-STAD | Stomach adenocarcinoma                | 13             | 19                     |
| TCGA-LIHC | Liver hepatocellular carcinoma        | 19             | 8                      |
| TCGA-KIRP | Kidney renal papillary cell carcinoma | 10             | 19                     |

*Table 2. The random forests column denotes the number of random forests based signatures having a lower log-rank p-value than their corresponding differential expression based signatures. The extreme pseudo-samples column denotes the number of extreme pseudo-samples based signatures having a lower log-rank p-value than their corresponding differential expression based signatures. The 3 colors (green, yellow, red) refer to cases where the proposed methods have a higher number, the same number, and a lower number of best-performing gene signatures than DESeq2, respectively.*

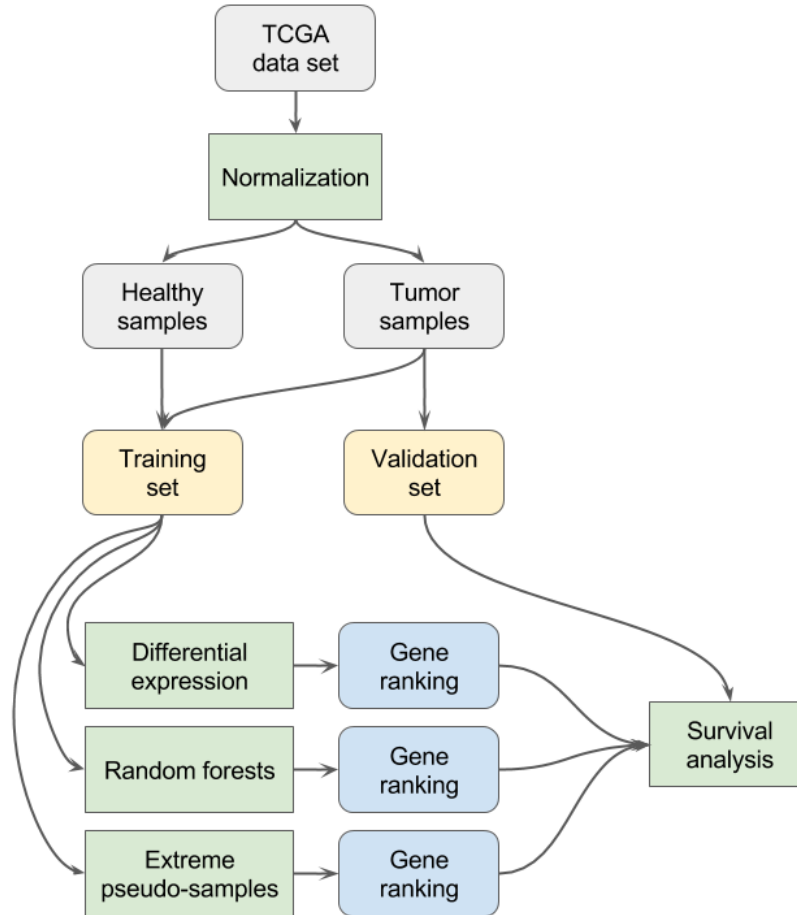

Source: https://www.biorxiv.org/content/biorxiv/early/2018/03/15/282780.full.pdf
